# Supplementary material for: A Functional Adenosine Deaminase Polymorphism Associates with Evening Melatonin Levels and Sleep Quality
Source: PubMed Central journal article supplement (PMC8086720; doi:10.5334/jcr.209), 2021-04-28
Supplement: jcr-19-209-s1.pdf [file jcr-19-209-s1.pdf]

**Supplemental Table 1.** Genotype difference separated by sex.

| Variable         |    | Men     |          | Women   |          |
|------------------|----|---------|----------|---------|----------|
|                  |    | Mean    | SD       | Mean    | SD       |
| Melatonin        | GG | 19.8700 | 10.52342 | 20.7245 | 7.85711  |
|                  | AG | 28.7644 | 28.28441 | 25.1301 | 10.37843 |
| PSQ              | GG | 5.2600  | 2.79926  | 5.4644  | 2.46865  |
|                  | AG | 3.4583  | 3.38532  | 4.2647  | 2.90307  |
| ISI              | GG | 5.7200  | 4.94571  | 7.6346  | 4.34326  |
|                  | AG | 8.5000  | 7.47663  | 7.0294  | 5.35121  |
| ESS              | GG | 8.0800  | 3.60463  | 8.8365  | 3.70707  |
|                  | AG | 6.5833  | 4.05483  | 7.8897  | 3.83820  |
| MEQ              | GG | 8.0800  | 3.60463  | 8.9434  | 3.68163  |
|                  | AG | 7.8333  | 5.34478  | 8.0882  | 3.87977  |
| POMS             | GG | 5.0000  | 21.94691 | 4.3269  | 15.98495 |
|                  | AG | 22.6667 | 31.16194 | 8.5152  | 15.96896 |
| State Anxiety    | GG | 27.3200 | 16.80952 | 25.9216 | 13.85185 |
|                  | AG | 22.8333 | 25.45126 | 23.7188 | 17.58341 |
| Trait Anxiety    | GG | 35.2500 | 8.80341  | 35.8868 | 8.09715  |
|                  | AG | 39.3333 | 8.18942  | 37.6875 | 10.12005 |
| CES-D            | GG | 14.0800 | 13.75960 | 14.0192 | 11.95332 |
|                  | AG | 21.0000 | 13.19091 | 17.1250 | 16.35641 |
| Perceived Stress | GG | 11.6800 | 7.20948  | 14.4906 | 6.55633  |
|                  | AG | 20.3333 | 13.36663 | 14.4375 | 9.49682  |
